# Supplementary material
Source: MDPI journal article supplement (https://www.mdpi.com/2673-4079/1/3/19)
Supplement: s1 [file s1]

# Biocatalyzed Sulfoxidation in Presence of Deep Eutectic Solvents

## 1. Experimental Procedures

### 1.1. Preparation of the Natural Deep Eutectic Solvents

Two components NADES were prepared by adding the ammonium salt (ChCl) and the hydrogen bond donors (Urea, Gly, EG and Xyl) at a molar ratio of 1:2 for Gly and EG, or 1:1 in the case of Urea and Xyl, in a beaker and incubated at 80 °C for 2 hours with intermediate stirring, until a colourless clear liquid was formed. The resulting DES was cooled down to room temperature and use without further purification. When obtaining Glu:Fru:H<sub>2</sub>O or ChCl:Glu:H<sub>2</sub>O, the same procedure was followed, mixing the three components in 1:1:6 or 5:2:5 molar ratio, respectively.

### 1.2. Study of the Ethyl Phenyl Sulfide Catalysed Sulfoxidation in Presence of Different NADESs.

Ethyl phenyl sulfide 1a (10 mM) was added to 1.0 mL Tris/HCl 50 mM pH 9.0/NADES mixture containing NADPH (0.2 mM), sodium phosphite (10 mM) and *m*FMO (1.0 μM). The reactions were stirred at 28 °C and 220 rpm for 24 h. Once finished, the reactions were extracted with EtOAc (3 × 0.5 mL) and dried onto Na<sub>2</sub>SO<sub>4</sub>. The samples were directly analysed by GC/MS and HPLC in order to determine, respectively, the level of conversion and the enantiomeric excess of chiral sulfoxide (S)-1b. Results for some of the NADESs tested are summarized in Table S1.

**Table S1.** Biocatalyzed oxidation of ethyl phenyl sulphide (1a) in buffer containing different NADESs catalysed by *m*FMO.

| Entry | DES                               | % DES | Conv. (%) <sup>1</sup> | ee (%) <sup>2</sup> |
|-------|-----------------------------------|-------|------------------------|---------------------|
| 1     | Glu:Fru:H <sub>2</sub> O (1:1:6)  | 10    | >40.5 ± 2.1            | 71.5 ± 2.1          |
| 2     | Glu:Fru:H <sub>2</sub> O (1:1:6)  | 20    | 35.0 ± 1.4             | 67.0 ± 1.4          |
| 3     | Glu:Fru:H <sub>2</sub> O (1:1:6)  | 40    | 10.5 ± 0.7             | 65.5 ± 0.7          |
| 4     | ChCl:Glu:H <sub>2</sub> O (5:2:5) | 10    | 37.5 ± 2.1             | 66.0 ± 1.4          |
| 5     | ChCl:Glu:H <sub>2</sub> O (5:2:5) | 20    | 12.0 ± 1.4             | 41.0 ± 1.4          |
| 6     | ChCl:Xyl (1:1)                    | 10    | 28.0 ± 1.4             | 61.5 ± 2.1          |
| 7     | ChCl:Xyl (1:1)                    | 20    | 5.5 ± 0.7              | n.d.                |
| 8     | ChCl:Urea (1:1)                   | 10    | 8.5 ± 0.7              | 50.5 ± 0.7          |

<sup>1</sup> Conversion was determined by GC/MS. <sup>2</sup> Optical purity of (S)-1b was measured by HPLC. Average values of two or more experiments. n.d. not determined.

### 1.3. General Procedure for the *m*FMO-Catalyzed Sulfoxidation of 1a at Different Substrate Concentrations.

Ethyl phenyl sulfide 1a (20–200 mM) was added to 1.0 mL Tris/HCl 50 mM pH 9.0/ 5 or 10% v/v ChCl:EG (1:1) or ChCl:Gly (1:1) mixture containing NADPH (0.2 mM), sodium phosphite (20–200 mM, 1.0 equiv.) and *m*FMO (1.0 μM). The reactions were stirred at 28 °C and 220 rpm for the times established (24–96 hours). Once finished, the reactions were extracted with EtOAc (3 × 0.5 mL) and dried onto Na<sub>2</sub>SO<sub>4</sub>. The samples were directly analysed by GC/MS and HPLC in order to determine, respectively, the level of conversion and the enantiomeric excess of chiral sulfoxide (S)-1b.

### 1.4. Sulfoxidations Catalysed by *m*FMO in Buffer Tris/HCl 50 mM pH 9.0 Containing 10% v/v ChCl:Gly (1:1).

Prochiral sulphides 2-6a (100 mM) were dissolved in 1.0 mL of a mixture Tris/HCl 50 mM pH 9.0/ 10% v/v ChCl:Gly (1:1) containing NADPH (0.2 mM), sodium phosphite (100 mM) and *m*FMO (1.0 μM). The reactions were stirred at 28 °C and 220 rpm for 96 h. Once finished, the reactions were extracted with EtOAc (3 × 0.5 mL) and dried onto Na<sub>2</sub>SO<sub>4</sub>. The samples were directly analysed by GC/MS and HPLC in order to determine, respectively, the level of conversion and the enantiomeric excess of chiral sulfoxide (S)-2-6b.

## 2. GC Analyses

GC Analyses were performed on a HP-5MS cross-linked methyl siloxane column (30 m × 0.25 mm × 0.25 μm, 1.0 bar N<sub>2</sub>) and were used for the determination of the conversions and the amount of sulfoxides 1-6b (Table S2). For all the compounds, the following program was employed: 50 °C (5 min), 10 °C/min, 200 °C (3 min).

**Table S2.** Determination of conversions and amounts of sulfoxides and sulfones by employing GC.

| Substrate | <i>t<sub>R</sub></i> (min) a | <i>t<sub>R</sub></i> (min) b |
|-----------|------------------------------|------------------------------|
| <b>1</b>  | 11.0                         | 15.1                         |
| <b>2</b>  | 12.2                         | 16.2                         |
| <b>3</b>  | 14.9                         | 18.6                         |
| <b>4</b>  | 15.7                         | 18.6                         |
| <b>5</b>  | 12.5                         | 17.0                         |
| <b>6</b>  | 18.9                         | 21.8                         |

## 3. HPLC Analyses

For the determination of the enantiomeric excesses of compounds 1-12b (Table S3), the following column was employed: Chiralcel OD (0.46 cm × 25 cm) from Daicel.

**Table S3.** Determination of enantiomeric excesses by HPLC.

| Substrate | T (°C) | Eluent <sup>a</sup>       | Retention time [min] |
|-----------|--------|---------------------------|----------------------|
| <b>1b</b> | 30     | <i>n</i> -hexane-IPA 9:1  | 12.9 (R); 16.5 (S)   |
| <b>2b</b> | 30     | <i>n</i> -hexane-IPA 95:5 | 10.2 (R); 12.0 (S)   |
| <b>3b</b> | 30     | <i>n</i> -hexane-IPA 9:1  | 14.1 (R); 15.2 (S)   |
| <b>4b</b> | 30     | <i>n</i> -hexane-IPA 9:1  | 24.0 (R); 28.5 (S)   |
| <b>5b</b> | 30     | <i>n</i> -hexane-IPA 9:1  | 17.0 (R); 18.7 (S)   |
| <b>6b</b> | 30     | <i>n</i> -hexane-IPA 95:5 | 26.1 (R); 29.0 (S)   |

<sup>a</sup> All the experiments were performed with isocratic eluent. Flow rate 1.0 mL min<sup>-1</sup>.
